# Supplementary material for: Ovarian carcinoma immunoreactive antigen–like protein 2 (OCIAD2) is a novel complex III–specific assembly factor in mitochondria
Source: PubMed Central journal article supplement — Mol Biol Cell. 2022 Mar 17;33(4):ar29. doi: 10.1091/mbc.E21-03-0143 (PMC9250361; doi:10.1091/mbc.e21-03-0143), 2022-03-17
Supplement: mbc-33-ar29-s001.pdf [file mbc-33-ar29-s001.pdf]

# Supplementary Materials

*Molecular Biology of the Cell*

Chojnacka *et al.*

## SUPPLEMENTARY FIGURE LEGENDS

|                       |                                     |                                        |                             |     |
|-----------------------|-------------------------------------|----------------------------------------|-----------------------------|-----|
| <i>H. sapiens</i>     | -----MASASARGNQDKDAHFPPPSKQSLLF     | CPKSKLHIHRAEISKIMRECQEESFWK            | 53                          |     |
| <i>P. troglodytes</i> | -----MASASARGNQDKDPHFPPPSKQSLLF     | CPKSKLHIHRAEISKIMRECQEESFWK            | 53                          |     |
| <i>M. musculus</i>    | -----MASVSTHGNQEKSPHLPLSKQSLLF      | CPKSKLHIHRGEIAKIIRECQEESFWK            | 53                          |     |
| <i>X. leavis</i>      | MSAETVPAAAAAAAAAAVPAQDKKPCPVSSSLMHC | PMSY--AHREDFAKVMKECKEESFWY             | 58                          |     |
| <i>D. rerio</i>       | MSTEG-----NQSTGGESAVDTKSGRPGWKQFQC  | PIADPRFPREDVKQIWMCEQHDSFWY             | 55                          |     |
| <i>H. sapiens</i>     | RALPFSLVSM                          | LVTQGLVYQGYLAANSRFGSLPKVALAGLLGFGLGKVS | YIGVCQSKFHFF                | 113 |
| <i>P. troglodytes</i> | RALPFSLVSM                          | LITQGLVYQGYLAANSRFGSLPKVALAGLLGFGLGKVS | YIGVCQSKFHFF                | 113 |
| <i>M. musculus</i>    | RALPFSLISML                         | VLTQGLVHQGYLAANPRFGSLPKVALAGLLGFGLGKAS | YIRVCQSKFHFS                | 113 |
| <i>X. leavis</i>      | RALPISLGSML                         | VLTQGLVYKGYLSRNKRFGSLPKVALAGVLYGMI     | GKISYARTFQKKFEEA            | 118 |
| <i>D. rerio</i>       | RALPLSAGSMA                         | VTGGLIYSGVWKQSKRFGYFPKLILAGIVGFAV      | GKASYIGTCREKFNNK            | 115 |
| <i>H. sapiens</i>     | ED-----QLRGAGFGPQ----               | HNRHCLLTCEECKIKHGLSEKGD                | SQPSAS---                   | 154 |
| <i>P. troglodytes</i> | ED-----QLRGAGFGPQ----               | HNRHCLLTCEECKIKHGLSEKGD                | SQASAS---                   | 154 |
| <i>M. musculus</i>    | ED-----QLRGAGFGPE----               | HNRHCLLTCE                             | DCKTRRGLSEKAGSQPSAS---      | 154 |
| <i>X. leavis</i>      | GMQ----PLFDAGFVPPF--                | AQKKS                                  | CRHTCEECAKSTTDQGQNTQASAPGTS | 165 |
| <i>D. rerio</i>       | LGPEFTKAFGGPGFPGGFRPGHNC            | IHVCEKCKQ                              | QEAQAATVPDAPTQS---          | 165 |

### Supplementary Figure S1 Chojnacka, Elancheliyan, et al.

**Supplementary Figure S1:** OCIAD2 is a metazoan specific protein. Alignment of the human (*H. sapiens*) OCIAD2 amino acid sequence to its metazoan homologs using ClustalW. Dark gray shading indicates identical amino acids, whereas medium or light gray shading depicts similar amino acids: 80% or 60% similarity, respectively.

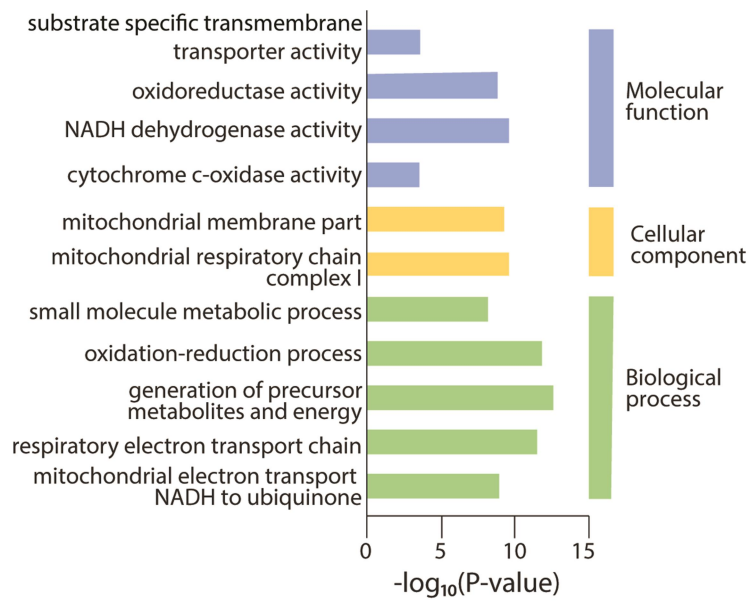

## Supplementary Figure S2 Chojnacka, Elancheliyan, et al.

**Supplementary Figure S2:** OCIAD2 interacts with electron transport chain proteins. GO terms significantly enriched among the mitochondrial proteins specifically bound to <sup>FLAG</sup>OCIAD2 obtained in Fisher test's for 48 proteins groups with mean fold enrichment >2 in <sup>FLAG</sup>OCIAD2 vs Ctrl samples compared to all IMPI listed protein groups (bait was excluded) identified in the co-IP experiment (FDR = 0.01)

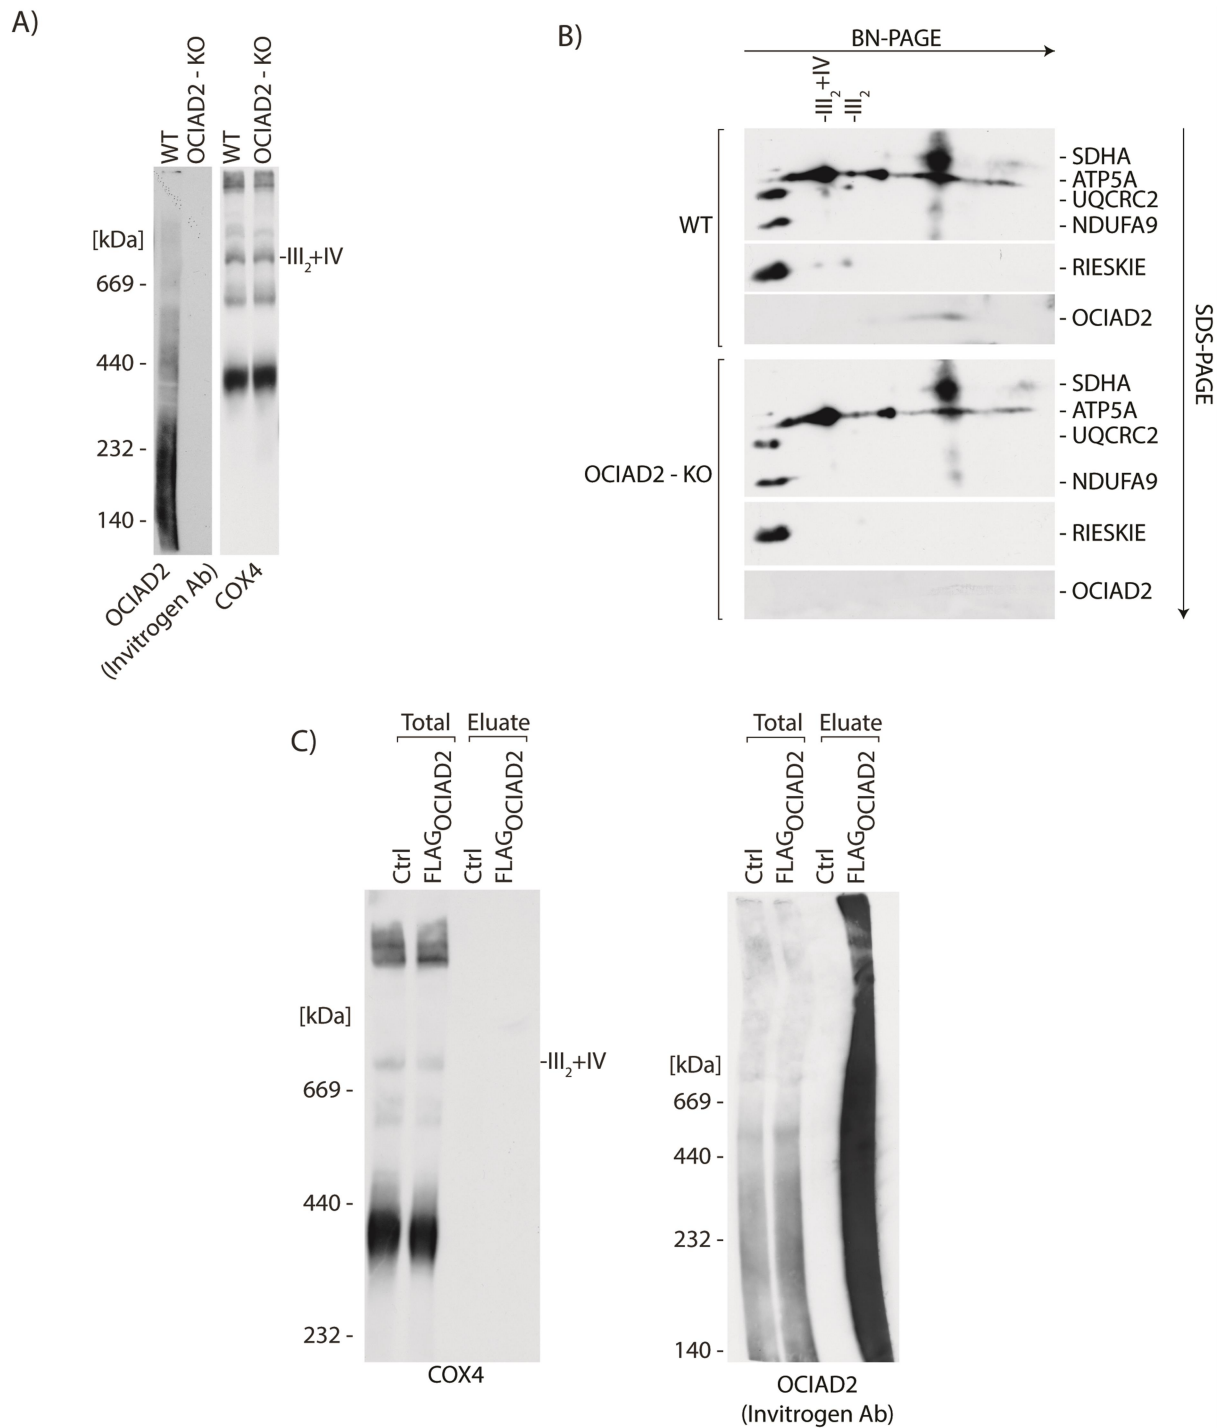

### Supplementary Figure S3 Chojnacka, Elancheliyan, et al.

**Supplementary Figure S3:** Analysis of isolated mitochondria from WT and OCIAD2-KO cells. (A) Isolated mitochondria were solubilized by 1% digitonin buffer and resolved using BN-PAGE gels. Followed by western blotting and immunodetection using indicated antibodies. (B) 2D gel analysis of isolated mitochondria of WT and OCIAD2-KO cells. Solubilized

mitochondria resolved using BN-PAGE gels. The complex in the gels are disrupted and resolved again in SDS-PAGE followed by western blotting and immunodetection using indicated antibodies. (C) <sup>FLAG</sup>OCIAD2 was immunopurified and elute was resolved using BN-PAGE gels.

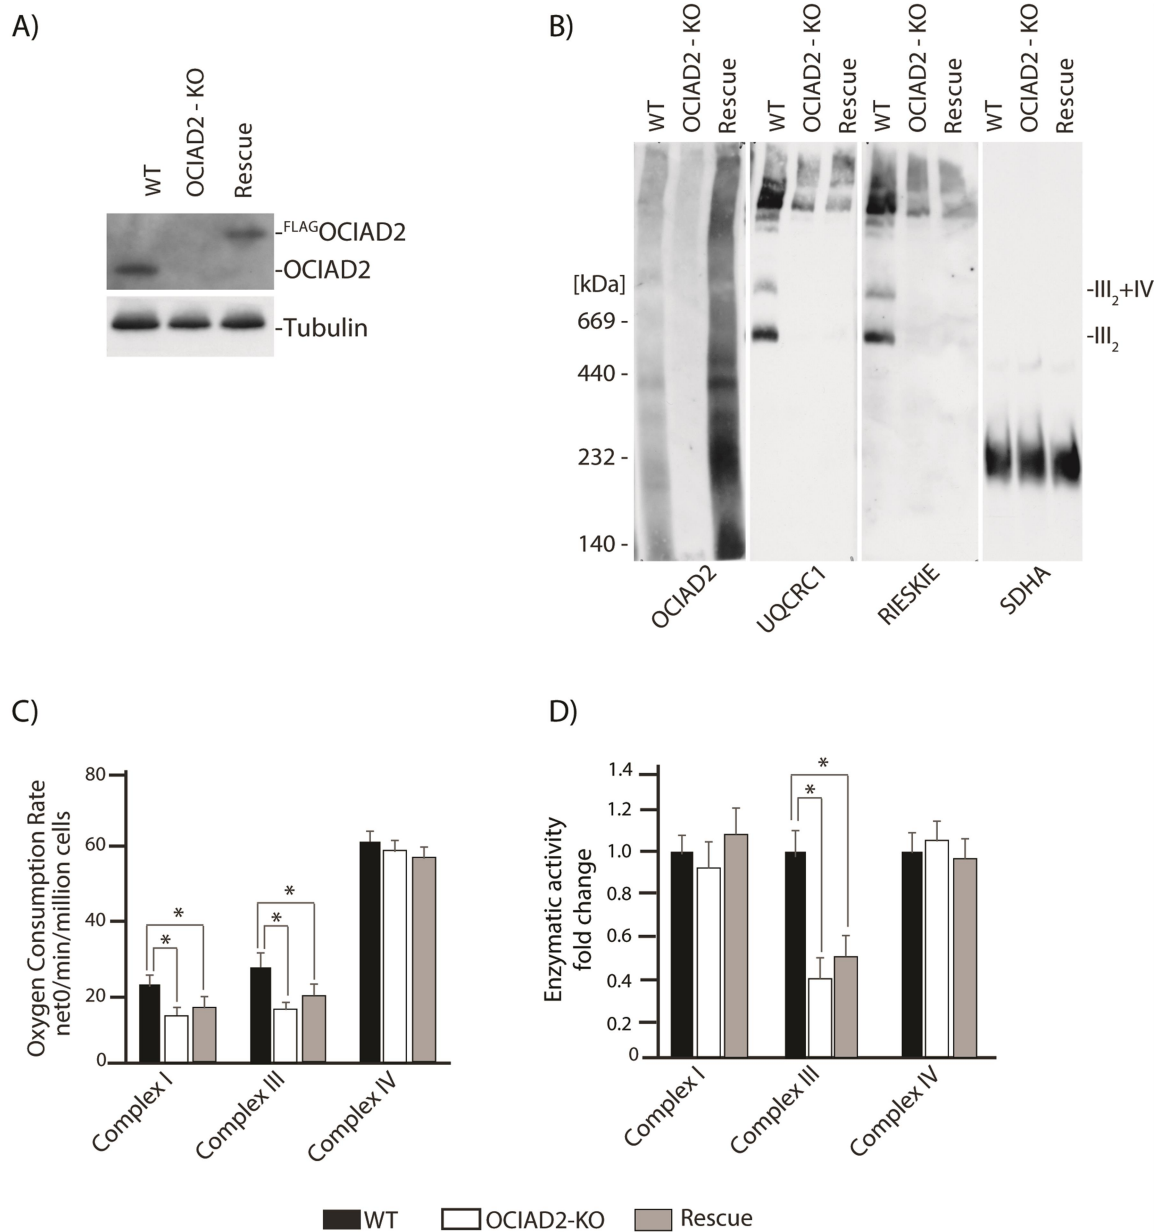

### Supplementary Figure S4 Chojnacka, Elancheliyan, et al.

**Supplementary Figure S4:** Overexpression of <sup>FLAG</sup>OCIAD2 in OCIAD2-KO cells. (A) Expression of <sup>FLAG</sup>OCIAD2 was analyzed by western blotting. (B) Isolated mitochondria from WT, OCIAD-KO, <sup>FLAG</sup>OCIAD2 overexpressed in OCIAD2-KO cells were analyzed by BN-PAGE and western

blotting. (C) Respiration of digitonin-permeabilized cells to assess isolated complex I, complex III and complex IV activity in control, OCIAD2-KO and OCIAD2-KO overexpressing <sup>FLAG</sup>OCIAD2. (D) Complex I, complex III and complex IV activity assessed by enzymatic assay in control, OCIAD2-KO and OCIAD2-KO overexpressing <sup>FLAG</sup>OCIAD2. mean  $\pm$  SD (n = 3). \*p < 0.05 (two-tailed Student's t-test).

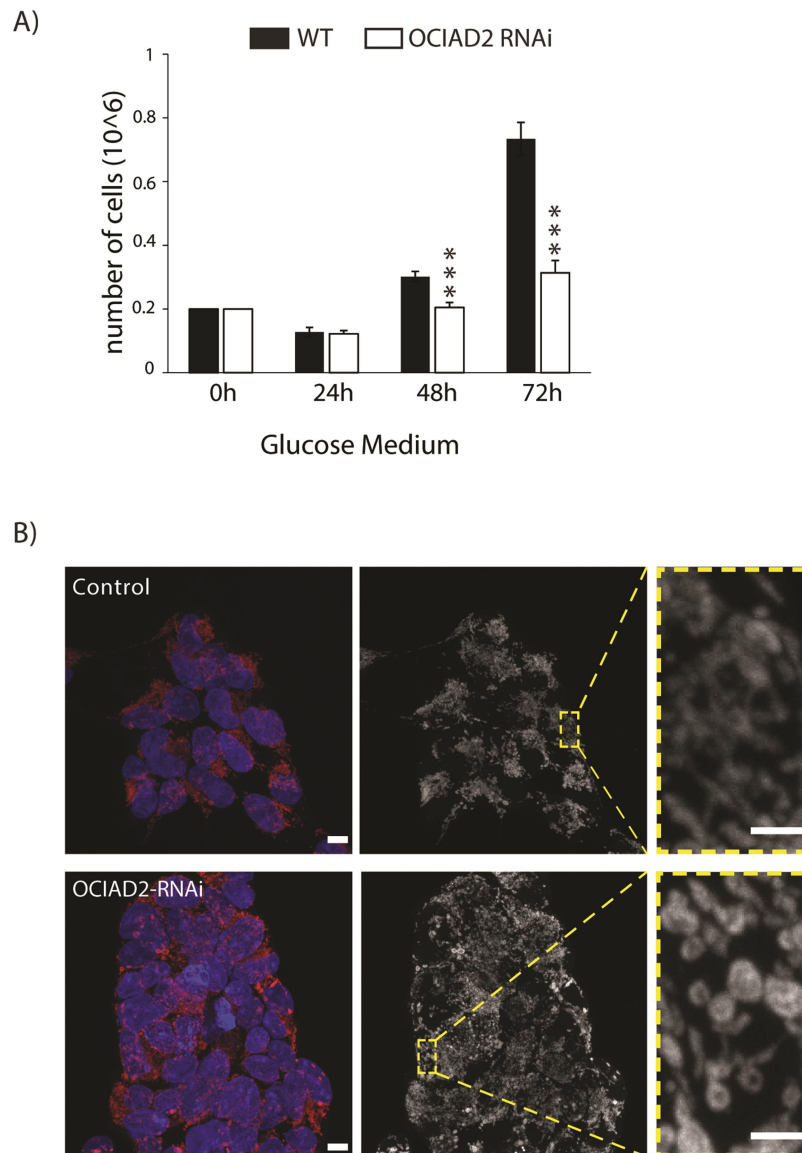

**Supplementary Figure S5**  
**Chojnacka, Elancheliyan, et al.**

**Supplementary Figure S5:** Replication of OCIAD2-KO cells phenotype by silencing OCIAD2.

(A) Proliferation assay of OCIAD2 RNAi treated cells.  $0.2 \times 10^6$  cells/well were seeded and reverse transfected with OCIAD2 RNAi duplex in growth medium. After indicated times, cells were harvested by trypsinization and counted. Data are shown as the mean  $\pm$  SD (n = 5) \*\*\* $p < 0.01$  (two-tailed Student's t-test). (B) Control and OCIAD2 RNAi duplex treated cells were immunolabelled using antibody CyclophilinD to visualize mitochondria. Scale bar 16  $\mu\text{m}$ .
